# Supplementary material for: Photogenerated carrier dynamics at the B4C3/g-C3N4 interface
Source: Royal Society of Chemistry journal article supplement (doi:10.1039/d2cp02175g), 2022-01-01
Supplement: d2cp02175g1.pdf [file d2cp02175g1.pdf]

## Supplementary Information

### Photogenerated carrier dynamics at the $B_4C_3/g-C_3N_4$ interface

Xianke Yue, Hong-Yao Liu, Yujun Zheng\* and Huan Yang\*

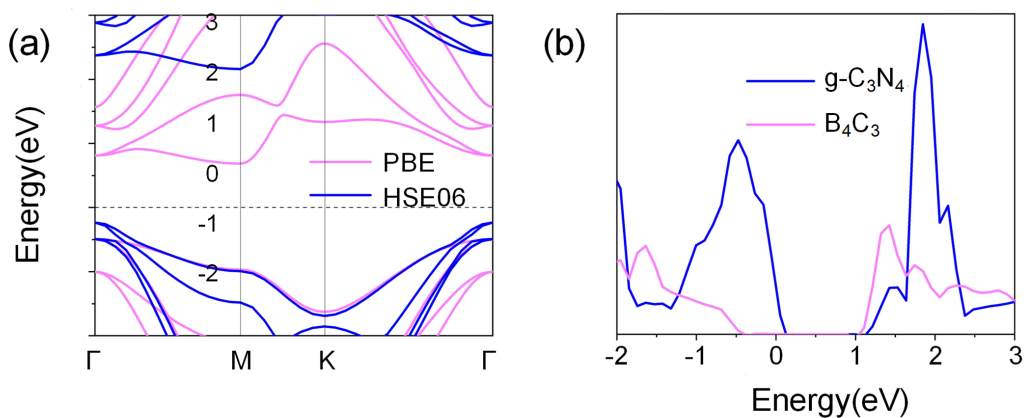

**Fig. S1** The band structures (a) and density of states (b) of the  $B_4C_3/g-C_3N_4$  heterostructure.

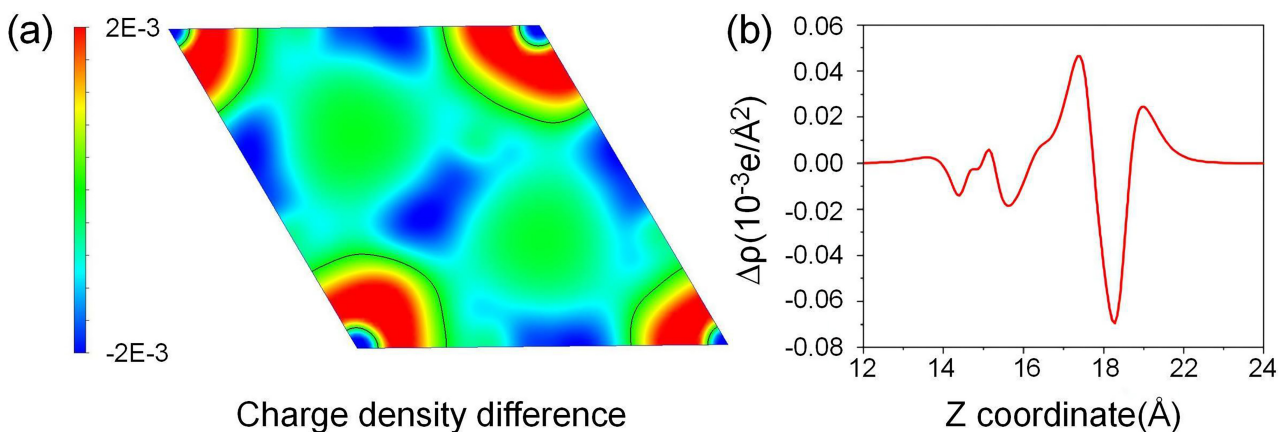

**Fig. S2** (a) Charge different density of  $B_4C_3/g-C_3N_4$  heterostructure. Red and blue colors denote  $\Delta\rho > 0$  and  $\Delta\rho < 0$  regions, respectively. (b) Plane averaged charge difference  $\Delta\rho$ .
